RESEARCH ARTICLE

# The Urinary Phosphate to Serum Fibroblast Growth Factor 23 Ratio Is a Useful Marker of Atherosclerosis in Early-Stage Chronic Kidney Disease

Hodaka Yamada<sup>1\*</sup>, Makoto Kuro-o<sup>2</sup>, Kazuo Hara<sup>1</sup>, Yuichiro Ueda<sup>1</sup>, Ikuyo Kusaka<sup>1</sup>, Masafumi Kakei<sup>1</sup>, San-e Ishikawa<sup>3</sup>

**1** Department of Medicine, Jichi Medical University Saitama Medical Center, 1-847 Amanuma-cho, Omiya-ku, Saitama, 330-8503, Japan, **2** Center for Molecular Medicine, Jichi Medical University, 3311-1 Yakushiji Shimotsuke, Tochigi, 329-0498, Japan, **3** Division of Endocrinology and Metabolism, International University of Health and Welfare Hospital, 537-3 Iguchi, Nasushiobara, Tochigi, 329-2763, Japan

\* [hyamada0510@jichi.ac.jp](mailto:hyamada0510@jichi.ac.jp)

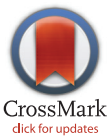

OPEN ACCESS

**Citation:** Yamada H, Kuro-o M, Hara K, Ueda Y, Kusaka I, Kakei M, et al. (2016) The Urinary Phosphate to Serum Fibroblast Growth Factor 23 Ratio Is a Useful Marker of Atherosclerosis in Early-Stage Chronic Kidney Disease. PLoS ONE 11(8): e0160782. doi:10.1371/journal.pone.0160782

**Editor:** Effie C Tsilibary, National Center for Scientific Research Demokritos, GREECE

**Received:** February 19, 2016

**Accepted:** July 25, 2016

**Published:** August 9, 2016

**Copyright:** © 2016 Yamada et al. This is an open access article distributed under the terms of the [Creative Commons Attribution License](https://creativecommons.org/licenses/by/4.0/), which permits unrestricted use, distribution, and reproduction in any medium, provided the original author and source are credited.

**Data Availability Statement:** All relevant data are within the main manuscript.

**Funding:** M. K. is supported by research grants from AMED-CREST, JST, MEXT-Supported Program for the Strategic Research Foundation at Private Universities, and Vehicle Racing Commemorative Foundation. This research was supported by grant from The Kidney Foundation, Japan (JKFB15-33). The funders had no role in study design, data collection and analysis, decision to publish, or preparation of the manuscript.

## Abstract

### Background

Fibroblast growth factor 23 (FGF23) regulates mineral homeostasis. In developed renal dysfunction, FGF23 levels increase to maintain the phosphate excretion capacity. However, in diabetic patients with early-stage renal impairment, the FGF23 elevation is not very sensitive. We hypothesized that urinary phosphate (U-P)/serum FGF23 ratio would theoretically be an index that reflects the number of nephrons (nephron index). In this study, we determined whether the nephron index would be associated with renal function and vascular diseases in diabetic patients.

### Methods

In total, 142 patients with diabetes mellitus were enrolled. The nephron index was calculated using the following formula: U-P (mg/day)/ serum FGF23 (pg/ml).

### Results

The mean age was  $63 \pm 11$  years and eGFR levels were  $79.5 \pm 25.4$  ml/min/1.73 m<sup>2</sup>, respectively. Thirty patients had a medical history of macroangiopathy. The Nephron index was significantly decreased in subjects with macroangiopathy compared with those without macroangiopathy. A multivariate analysis of risk factors for macroangiopathy revealed that duration of diabetes, eGFR, and nephron index were significantly associated with a higher frequency of arteriosclerotic disease.

**Competing Interests:** The authors have declared that no competing interests exist.

## Conclusion

These findings suggest that a decrease in nephron index reflects early-stage renal impairment and is an independent risk factor of macroangiopathy in diabetic patients.

## Introduction

Fibroblast growth factor 23 (FGF23) is a bone-derived hormone that plays a central role in the metabolic regulation of phosphate (P) and vitamin D [1–3]. FGF23 acts on the kidney to increase urinary P (U-P) excretion. The phosphaturic activity of FGF23 is based on its ability to suppress renal P reabsorption at the proximal tubules. Thus, FGF23 increases the P excretion at each nephron. Serum FGF23 levels are elevated in patients with chronic kidney disease (CKD). During CKD progression, FGF23 increases as early as at stage 2, long before serum P levels increase, which occurs at stage 4 or later. The progressive increase in FGF23 may be regarded as a response to the progressive decrease in the number of functional nephrons, which must be compensated by an increased P excretion per nephron to maintain the P homeostasis. Thus, in individuals with neutral P balance and equivalent P intake, a higher FGF23 suggests a lower number of nephrons. In fact, high serum FGF23 levels are associated with poor clinical outcomes in CKD patients [4–11].

Diabetes mellitus can cause CKD and is a risk factor for atherosclerosis and cardiovascular mortality. Although diabetic patients in early stages of CKD (stages 1 and 2) are reported to have lower FGF23 than nondiabetic patients matched for sex, age, and estimated glomerular filtration rate (eGFR) [12], FGF23 may still be useful as an early biomarker of CKD in diabetic patients. It was recently reported that a low fractional excretion of P (FEp)/FGF23 ratio is associated with severe abdominal aortic calcification in CKD stages 3 and 4 [13]. Because FGF23 suppresses P reabsorption at the proximal tubules, the fundamental role of FGF23 is to increase FEp. Thus, FEp/FGF23 is thought to represent the sensitivity of the kidney to FGF23.

In this report, we propose the ratio of U-P excretion (mg/day) to FGF23 as an index that theoretically represents the number of nephrons (nephron index) [1, 14]. Provided that FGF23 correlates with P excretion per nephron, namely,

$$P \text{ excretion per nephron} = \frac{\text{Urinary P excretion}}{\text{Nephron number}} \propto \text{FGF23}$$

$$\therefore \text{Nephron number} \propto \frac{\text{Urinary P excretion}}{\text{FGF23}} \equiv \text{Nephron index}$$

If the Nephron index indeed reflects the functional nephron number, it will start decreasing in early stage CKD and potentially be useful for following up the progression, evaluating the risk for complications, and making a decision when to start the treatment in preemptive medicine. In the present retrospective, cross-sectional study, we determined whether the nephron index would be associated with renal function and vascular diseases in diabetic patients.

## Materials and Methods

### Subjects

The present study enrolled 142 subjects with type 2 diabetes mellitus. The cohort had a mean age of 63.0 years and included 73 men and 69 women. The subjects had been hospitalized at

Jichi Medical University Saitama Medical Center to control their plasma glucose levels and complicated disorders. Blood samples after overnight fasting and daily total urine samples were collected from the subjects. Based on the KDIGO 2012 CKD guideline, the patients were classified into three groups according to eGFR degrees as follows: normal or high (G1; eGFR  $\geq$  90), mildly decreased (G2; eGFR 60–89), and mildly to moderately decreased (G3; eGFR 30–59). Subjects categorized as G4 (severely decreased, eGFR 15–29) were excluded from the present study. Thirty subjects had a history of treatment for macroangiopathy (30 had ischemic heart disease, 13 had cerebral vascular diseases, and 3 had peripheral arterial disease). Overall, 76 subjects had hypertension, 72 subjects had dyslipidemia, and 45 were smokers. None of the patients were administering vitamin D or calcium carbonate. The duration of the diabetes mellitus was estimated by the patients' medical records. The occurrence of diabetic retinopathy was confirmed by an ophthalmologist.

## Measurements

Blood samples were collected into tubes and centrifuged at 3,000 rpm at 4°C for 15 min. The supernatants were decanted and frozen at  $-80^{\circ}\text{C}$  until assayed.

Serum levels of HbA1c, Ca, P, 25OH vitD, FGF23, and intact PTH were determined. Serum FGF23 was measured by enzyme-linked immunosorbent assay (ELISA) using intact FGF23 ELISA kits (Kainos, Tokyo, Japan). The intra- and inter-assay coefficients of variation were  $<4.0\%$  and  $4\%$ , respectively. Serum 25OH vitD was measured by ELISA using 25OH vitD ELISA kits (Immundiagnostik AG, Bensheim, Germany). The intra- and inter-assay coefficients of variation were both  $<7.0\%$ . Serum FGF23 and serum 25OH vitD were measured in duplicate. Other variables were measured at a central laboratory section of the Jichi Medical University Saitama Medical Center. Renal function was determined by the eGFR, assessed by the Modification of Diet in Renal Disease equation revised for the Japanese population by the Japanese Society of Nephrology:

$$\text{eGFR (ml/min/1.73 m}^2\text{)} = 194 \times \text{serum creatinine (mg/dl)}^{-1.094} \times \text{age}^{-0.287} \times 0.739 \text{ (if female)}$$
[15]. The nephron index was calculated as the ratio of daily U-P excretion (mg/day) to serum FGF23 (pg/ml). The corrected serum Ca levels were calculated with the following equation: serum calcium + (4–serum albumin) (if serum albumin was  $\leq$  4 g/dl).

## Ethics Committee Approval

The study was approved by the Ethics Committee at Jichi Medical University Saitama Medical Center (No. 14–60) and performed in compliance with the Declaration of Helsinki. We obtained written consent from participants.

## Statistical Analysis

Data are expressed as mean  $\pm$  standard deviation, and skewed variables are described as median with interquartile range. Clinical characteristics were compared among the three groups using one-way ANOVA or Kruskal-Wallis test. Two groups were compared by Student's *t* test or Mann–Whitney *U* test, as appropriate. Categorical variables were compared by Fisher's exact test. The *post-hoc* analyses was performed as needed (Holm test for serum FGF23 and Nephron index). Pearson's correlation coefficient analysis was used for linear correlations between eGFR and serum P, intact PTH, FGF23, and Nephron index. Multivariate logistic regression analysis was conducted after univariate analysis. The variables were selected based on the comparison between with or without macroangiopathy. Namely, statistically significant variables were selected.

These variables were divided into two groups based on their averages in multivariate analysis. When a parameter revealed skewed distribution, the variable was transformed logarithmic parameters before analysis in correlation coefficient analysis and regression analysis. There was no missing data in each variable.

All analyses were performed with EZR (Saitama Medical Center, Jichi Medical University), a graphical user interface for R (The R Foundation for Statistical Computing, ver. 2.13.0) and a modified version of the R commander (ver. 1.6–3) that was designed to add statistical functions frequently used in biostatistics[16].  $p < 0.05$  was considered significant.

## Results

The clinical characteristics of the study participants are shown in [Table 1](#). Considering all subjects, mean hemoglobin A1c (HbA1c) level was 9.3%, and the mean duration of diabetes mellitus was 12.1 years. Overall, 71 subjects had diabetic retinopathy. Considering all three CKD stage groups (G1:  $n = 40$ ; G2:  $n = 70$ ; G3:  $n = 32$ ), the prevalence of hypertension, age, and duration of diabetes mellitus was significantly greater at the highest CKD stage class. There were no differences in serum calcium (Ca), P, and 25-hydroxyvitamin D3 (25OH vitD) levels. In contrast, serum FGF23 increased, and the nephron index decreased in association with the progression of CKD stage. A post-hoc analysis (Holm test) showed significant alterations in both FGF23 and nephron index initially at stage G2 ([Fig 1](#)). There was no difference in prevalence of diabetic microangiopathy (diabetic retinopathy and urinary albumin (U-albumin) levels). However, complicated macroangiopathy was significantly increased and associated with a higher CKD stage. A linear regression analysis model considering all the participants revealed a negative correlation of eGFR with logarithmic value log-transformed (Ln) intact parathyroid hormone (PTH) ( $r = -0.44$ ,  $p < 0.001$ ) and Ln FGF23 ( $r = -0.43$ ,  $p < 0.001$ ) and a positive correlation of eGFR with Ln nephron index ( $r = 0.47$ ,  $p < 0.001$ ), but not with serum P ( $r = -0.02$ ,  $p = 0.78$ ), as shown in [Fig 2](#). [Table 2](#) shows the difference in clinical parameters among subjects with ( $n = 30$ ) and without ( $n = 112$ ) macroangiopathy. The age and duration of diabetes mellitus were significantly higher in subjects with macroangiopathy. eGFR was significantly decreased in subjects with macroangiopathy compared with those without macroangiopathy. Regarding mineral metabolic parameters, U-P excretion and nephron index were significantly lower, whereas FGF23 was higher in subjects with macroangiopathy. There were no differences in serum Ca, P, intact PTH, and 25OH vitD levels. To determine the independent variables associated with the absence or presence of macroangiopathy, we performed a multiple logistic model analysis, shown in [Table 3](#). Age, presence of hypertension, duration of diabetes mellitus, eGFR, serum FGF23, U-P, and nephron index were included in the model as independent factors, which parameters were significant variables in the comparison with or without macroangiopathy (based on [Table 2](#)). After univariate analysis of these seven variables, the final model showed that eGFR, duration of diabetes mellitus, and nephron index were independent factors for macroangiopathy.

## Discussion

When CKD progresses to stages 4 and 5, hyperphosphatemia induces phenotypic changes, transforming vascular smooth muscle cells into osteoblast-like cells, thus contributing to calcification of blood vessels. Elevation of serum FGF23 is associated with cardiovascular calcification and mortality in end-stage kidney disease[17–19]. In the present study, we demonstrated a close association of the nephron index but not of serum FGF23 with macroangiopathy in early-stage CKD. The nephron index decreased significantly compared with the elevation of serum FGF23 levels in early-stage CKD (G2) in diabetic patients. The index also had a positive correlation with eGFR and decreased in patients with macroangiopathy. In this retrospective study,

**Table 1. Clinical characteristics of the participants with CKD stages G1–G3.** BMI, body mass index; DM, diabetes mellitus; SBP, systolic blood pressure; DBP, diastolic blood pressure; HbA1c, hemoglobin A1c; S-P, serum phosphate; U-P, 24-h urinary excretion of phosphate; S-Ca, serum calcium; 25OH vitD, 25-hydroxyvitamin D3; iPTH, intact parathyroid hormone; eGFR, estimated glomerular filtration rate; U-albumin, urinary albumin.

| Variable                           | All individuals (142) | G1 (40)         | G2 (70)         | G3 (32)       | p value |
|------------------------------------|-----------------------|-----------------|-----------------|---------------|---------|
| Age (years)                        | 63.0 ± 11.0           | 54.5 ± 11.4     | 64.7 ± 9.1      | 69.8 ± 7.5    | <0.001  |
| Male sex (%)                       | 51.4                  | 55.0            | 52.9            | 43.8          | 0.639   |
| Hypertension (n, %)                | 76 (53.5)             | 12 (30)         | 40 (57.1)       | 24 (75)       | <0.001  |
| Dyslipidemia (n, %)                | 72 (50.7)             | 16 (40)         | 41 (58.6)       | 15 (46.9)     | 0.233   |
| Smoking (n, %)                     | 45 (31.7)             | 7 (17.5)        | 28 (40)         | 10 (31.3)     | 0.052   |
| BMI (kg/m <sup>2</sup> )           | 25.0 ± 4.4            | 24.1 ± 4.4      | 25.3 ± 4.8      | 25.3 ± 3.3    | 0.317   |
| SBP (mmHg)                         | 132 ± 19              | 129 ± 20        | 134 ± 18        | 134 ± 18      | 0.297   |
| DBP (mmHg)                         | 74 ± 12               | 75 ± 12         | 76 ± 10         | 69 ± 16       | 0.032   |
| HbA1c (%)                          | 9.3 ± 1.5             | 9.6 ± 1.5       | 9.3 ± 1.5       | 9.1 ± 1.6     | 0.372   |
| Duration of DM (years)             | 12.1 ± 8.0            | 8.7 ± 7.2       | 12.2 ± 7.8      | 16.0 ± 7.8    | <0.001  |
| S-P (mg/dl)                        | 3.6 ± 0.5             | 3.6 ± 0.5       | 3.7 ± 0.5       | 3.6 ± 0.4     | 0.829   |
| U-P (mg/day)                       | 539 ± 182             | 604 ± 204       | 551 ± 168       | 432 ± 132     | <0.001  |
| S-Ca (mg/dl)                       | 9.2 ± 0.4             | 9.2 ± 1.4       | 9.3 ± 0.4       | 9.3 ± 0.48    | 0.712   |
| 25OH vitD (nmol/L)                 | 81.3 ± 31.4           | 78 ± 29         | 84 ± 32         | 81 ± 34       | 0.721   |
| iPTH (pg/mL)                       | 23 [20–26]            | 21 [18–23]      | 23 [20–25]      | 27 [23–35]    | 0.001   |
| eGFR (ml/min/1.73 m <sup>2</sup> ) | 79.5 ± 25.4           | 111 ± 19        | 76 ± 9          | 49 ± 9        | <0.001  |
| U-albumin (mg/day)                 | 13.9 [6.6–47.5]       | 13.5 [4.9–26.2] | 11.7 [5.6–37.9] | 24.1 [10–113] | 0.061   |
| Retinopathy (n, %)                 | 71 (50)               | 18 (45)         | 34 (48.6)       | 19 (59.4)     | 0.461   |
| Macroangiopathy (n, %)             | 30 (21)               | 3 (7.5)         | 12 (17.1)       | 15 (46.9)     | <0.001  |

doi:10.1371/journal.pone.0160782.t001

patients with G1–G3 early-stage CKD were enrolled to reveal that the nephron index may reflect CKD progression or a decrease in the number of functional nephrons.

Several studies have reported a relationship between FE<sub>p</sub> and serum FGF23 levels in mild-to-moderate CKD stages. Dominguez *et al.* have revealed that higher serum FGF23 levels are

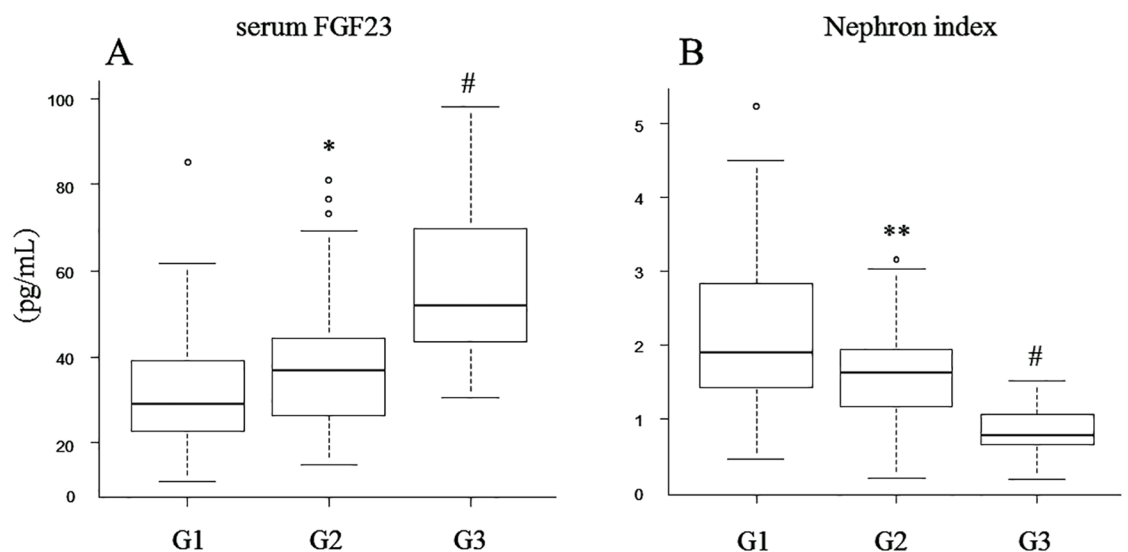

**Fig 1. Comparisons of serum FGF23 (pg/mL) (A) and Nephron index (B) in chronic kidney disease stages G1, G2, and G3 in diabetic patients.** \**p* < 0.05 vs. G1, \*\**p* < 0.01 vs. G1, #*p* < 0.01 vs. G2, *p* < 0.01 by post hoc analysis (Holm test) after Kruskal-Wallis test (*p* < 0.001).

doi:10.1371/journal.pone.0160782.g001

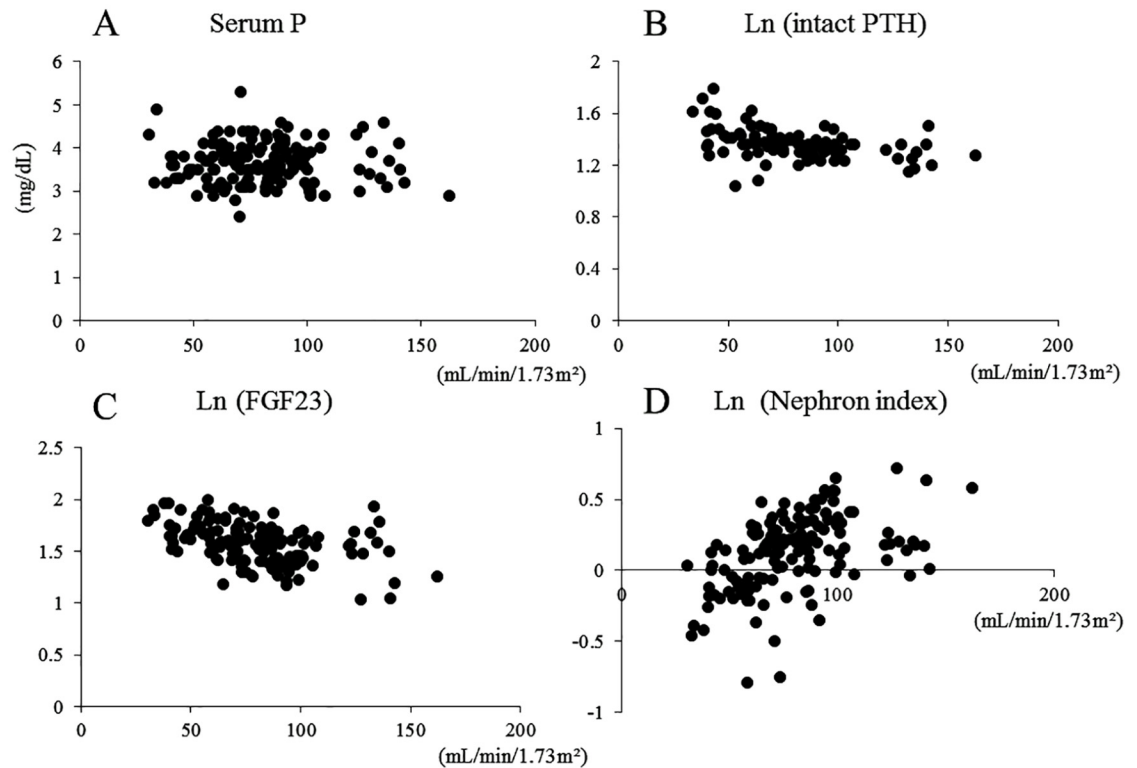

**Fig 2. Simple regression analyses of serum P, (A), Ln intact PTH (B), Ln FGF23 (C), and Ln Nephron index (D) with eGFR in diabetic patients.** Pearson's correlation coefficients were calculated. FGF23, fibroblast growth factor 23; Ln, logarithmic value.

doi:10.1371/journal.pone.0160782.g002

more strongly associated with mortality and cardiovascular events when accompanied by lower FE<sub>p</sub> in a population with relatively mild CKD (mean eGFR 71 ml/min/1.73 m<sup>2</sup>) [20]. Beck *et al.* have reported that a high serum FGF23 level was a significant predictor of poor prognosis in subjects with CKD stage 3–4, but FE<sub>p</sub> did not modify the relationship between FGF23 and clinical outcome [21]. These studies suggested that a high FGF23 and low FE<sub>p</sub> reflected FGF23 resistance, yielding a poor phosphaturic response of FGF23 in the kidney. In our study, we focused on the nephron index, which could theoretically estimate the number of nephrons [1, 14]. Recently, Craver *et al.* showed that a low FE<sub>p</sub>/FGF23 ratio was associated with the severity of abdominal aortic calcification in patients with CKD stages 3–4 independent of age, gender, and presence carotid plaque [13]. Our pilot study showed a similar relationship between the nephron index and macroangiopathy in stage 1–3 CKD. In early-to-middle CKD stages, serum FGF23, but not serum P, is elevated. Serum FGF23 is one of the earliest markers of CKD, and an increase in FGF23 indicates excess P intake relative to the residual nephron number. In contrast, the nephron index theoretically reflects the number of functional nephrons and may be regarded as another early marker of early CKD stages. In multivariate analysis, identifying variables associated with macroangiopathy and the nephron index, but not FGF23, was an independent factor after adjustment for intact PTH and other variables. Several reports have pointed out the absence of a relationship between serum FGF23 and atherosclerotic disorders, for instance, arterial calcification [22], abnormal intima-media thickness [23], and peripheral artery disease [24]. In contrast, FGF23 has been associated with heart failure [7]. The clinical impact of serum FGF23 elevation in mineral and bone disorders (MBD) may be different among various stages of CKD. In our study populations, with a mean eGFR of 79.5



**Table 2. Differences in clinical parameters in subjects with (n = 30) and without (n = 112) macroangiopathy** BMI, body mass index; DBP, diastolic blood pressure; DM, diabetes mellitus; eGFR, estimated glomerular filtration rate; FGF23, fibroblast growth factor 23; HbA1c, hemoglobin A1c; iPTH, intact parathyroid hormone; 25OH vitD, 25-hydroxyvitamin D3; SBP, systolic blood pressure; S-Ca, serum calcium; S-P, serum phosphate; U-albumin, urinary albumin; U-P, 24-h urinary excretion of phosphate.

| Variable                           | Without          | With             | p value |
|------------------------------------|------------------|------------------|---------|
| Age (years)                        | 61 ± 11          | 69 ± 9           | <0.001  |
| Male sex (%)                       | 47.3             | 66.7             | 0.067   |
| Hypertension (n, %)                | 54 (48.2)        | 22 (73.3)        | 0.022   |
| Dyslipidemia (n, %)                | 54 (48.2)        | 18 (60)          | 0.311   |
| Smoking (n, %)                     | 35 (31.3)        | 10 (33.3)        | 0.828   |
| BMI (kg/m <sup>2</sup> )           | 25.1 ± 4.7       | 24.6 ± 3.0       | 0.583   |
| SBP (mmHg)                         | 131 ± 18         | 137 ± 19         | 0.113   |
| DBP (mmHg)                         | 75 ± 13          | 71 ± 10          | 0.140   |
| HbA1c (%)                          | 9.4 ± 1.5        | 9.2 ± 1.6        | 0.504   |
| Duration of DM (years)             | 10.8 ± 7.2       | 16.7 ± 9.3       | <0.001  |
| S-P (mg/dl)                        | 3.6 ± 0.5        | 3.7 ± 0.5        | 0.725   |
| U-P (mg/day)                       | 564 ± 174        | 449 ± 183        | 0.002   |
| S-Ca (mg/dl)                       | 9.2 ± 0.4        | 9.2 ± 0.4        | 0.820   |
| 25OH vitD (nmol/L)                 | 80 ± 34          | 85 ± 328         | 0.547   |
| iPTH (pg/mL)                       | 23 [20–26]       | 23 [20–27]       | 0.436   |
| FGF23 (pg/mL)                      | 37 [26–48]       | 44 [32–62]       | 0.020   |
| Nephron index                      | 1.58 [1.04–2.18] | 1.05 [0.62–1.43] | <0.001  |
| eGFR (ml/min/1.73 m <sup>2</sup> ) | 83 ± 25          | 65 ± 21          | <0.001  |
| U-albumin                          | 14 [6.2–49]      | 13 [7.2–34]      | 0.908   |

doi:10.1371/journal.pone.0160782.t002

ml/min/1.73 m<sup>2</sup>, serum FGF23 was not an independent factor for macroangiopathy. Nakano *et al.* have shown that the serum FGF23 level in CKD stages 1 and 2 in diabetic patients is lower than that in nondiabetic patients due to dysfunction or decreased density of osteocytes and that diabetes mellitus affects vitamin D metabolism[12]. Indeed, in diabetic patients with osteoporosis, serum FGF23 level was decreased compared with those without osteoporosis. Moreover, serum FGF23 was related to the lumbar spine and femoral neck T-scores[23]. Therefore, there is a possibility that the clinical impact of serum FGF23 and MBD metabolic

**Table 3. Multivariate logistic regression analysis showing independent variables in the assessment of patients with macroangiopathy.** DM, diabetes mellitus; eGFR, estimated glomerular filtration rate; FGF23, fibroblast growth factor 23; U-P, 24-h urinary excretion of phosphate; OR, odds ratio.

| Univariate Analysis                |         |      |           |         |
|------------------------------------|---------|------|-----------|---------|
| Variable                           |         | OR   | 95% CI    | p value |
| Age (years)                        | ≥63     | 3.17 | 1.30–7.73 | 0.011   |
| Hypertension                       | Present | 2.95 | 1.21–7.19 | 0.017   |
| Duration of DM (years)             | ≥12     | 3.11 | 1.31–7.40 | 0.010   |
| eGFR (ml/min/1.73 m <sup>2</sup> ) | <79     | 6.43 | 2.29–18.0 | <0.001  |
| Ln FGF23                           | ≥1.57   | 2.07 | 0.89–4.82 | 0.091   |
| U-P (mg/day)                       | ≥540    | 2.39 | 1.03–5.57 | 0.043   |
| Ln Nephron index                   | <0.13   | 3.60 | 1.54–8.44 | 0.032   |
| Multivariate analysis              |         |      |           |         |
| Variable                           |         | OR   | 95% CI    | p value |
| eGFR (ml/min/1.73 m <sup>2</sup> ) | <79     | 3.63 | 1.19–11.1 | 0.024   |
| Ln Nephron index                   | <0.13   | 2.80 | 1.01–7.74 | 0.047   |
| Duration of DM (years)             | ≥12     | 2.71 | 1.07–6.89 | 0.036   |

doi:10.1371/journal.pone.0160782.t003

effects in a diabetic state may be different from those in a nondiabetic state. It is known that not only the glomerular damage but also the interstitial damage plays an important role in the progression of diabetic kidney disease[25]. The results of high FGF23 and low FGF23 may reflect diabetic tubular damage and loss of renal klotho. Therefore, it is necessary to evaluate the relationship between the nephron index and tubular markers, especially distal tubular damage markers since distal tubules express klotho.

There are limitations in our study. First, we could not determine whether the nephron index serves as an independent predictor of macroangiopathy in nondiabetic patients, such as in patients with CKD with primary glomerulonephritis, nephrosclerosis, and other kidney diseases. Second, we did not assess bone measures, including bone mineral density and medical history of bone fracture. It is known that patients with diabetes have abnormalities in bone metabolism (low bone formation) and an increased risk of hip and vertebral fractures[26–28]. The presence or absence of bone fractures or osteoporosis may have affected our results.

The present study demonstrates that the nephron index, which theoretically reflects the number of functional nephrons, is significantly decreased in early-stage CKD in diabetic patients. Furthermore, the number of nephrons is an independent risk factor for macroangiopathy. Further studies are needed to establish the nephron index as one of the earliest biomarkers of CKD.

## Acknowledgments

The authors thank Taeko Otani for the assistance with the ELISA technique.

## Author Contributions

**Conceived and designed the experiments:** HY MK (second author).

**Performed the experiments:** HY YU IK MK (sixth author) SI.

**Analyzed the data:** HY MK (second author) KH.

**Wrote the paper:** HY MK (second author).

## References

1. Kuro-o M. Klotho, phosphate and FGF-23 in ageing and disturbed mineral metabolism. *Nature reviews Nephrology*. 2013; 9(11):650–60. Epub 2013/06/19. doi: [10.1038/nrneph.2013.111](https://doi.org/10.1038/nrneph.2013.111) PMID: [23774819](https://pubmed.ncbi.nlm.nih.gov/23774819/).
2. Komaba H, Fukagawa M. The role of FGF23 in CKD—with or without Klotho. *Nature reviews Nephrology*. 2012; 8(8):484–90. Epub 2012/06/21. doi: [10.1038/nrneph.2012.116](https://doi.org/10.1038/nrneph.2012.116) PMID: [22714041](https://pubmed.ncbi.nlm.nih.gov/22714041/).
3. Isakova T, Ix JH, Sprague SM, Raphael KL, Fried L, Gassman JJ, et al. Rationale and Approaches to Phosphate and Fibroblast Growth Factor 23 Reduction in CKD. *Journal of the American Society of Nephrology: JASN*. 2015; 26(10):2328–39. Epub 2015/05/15. doi: [10.1681/asn.2015020117](https://doi.org/10.1681/asn.2015020117) PMID: [25967123](https://pubmed.ncbi.nlm.nih.gov/25967123/); PubMed Central PMCID: [PMCPmc4587706](https://pubmed.ncbi.nlm.nih.gov/PMC4587706/).
4. Gutierrez OM, Mannstadt M, Isakova T, Rauh-Hain JA, Tamez H, Shah A, et al. Fibroblast growth factor 23 and mortality among patients undergoing hemodialysis. *The New England journal of medicine*. 2008; 359(6):584–92. Epub 2008/08/09. doi: [10.1056/NEJMoa0706130](https://doi.org/10.1056/NEJMoa0706130) PMID: [18687639](https://pubmed.ncbi.nlm.nih.gov/18687639/); PubMed Central PMCID: [PMCPmc2890264](https://pubmed.ncbi.nlm.nih.gov/PMC2890264/).
5. Isakova T, Xie H, Yang W, Xie D, Anderson AH, Scialla J, et al. Fibroblast growth factor 23 and risks of mortality and end-stage renal disease in patients with chronic kidney disease. *Jama*. 2011; 305(23):2432–9. Epub 2011/06/16. doi: [10.1001/jama.2011.826](https://doi.org/10.1001/jama.2011.826) PMID: [21673295](https://pubmed.ncbi.nlm.nih.gov/21673295/); PubMed Central PMCID: [PMCPmc3124770](https://pubmed.ncbi.nlm.nih.gov/PMC3124770/).
6. Kendrick J, Cheung AK, Kaufman JS, Greene T, Roberts WL, Smits G, et al. FGF-23 associates with death, cardiovascular events, and initiation of chronic dialysis. *Journal of the American Society of Nephrology: JASN*. 2011; 22(10):1913–22. Epub 2011/09/10. doi: [10.1681/asn.2010121224](https://doi.org/10.1681/asn.2010121224) PMID: [21903574](https://pubmed.ncbi.nlm.nih.gov/21903574/); PubMed Central PMCID: [PMCPmc3187186](https://pubmed.ncbi.nlm.nih.gov/PMC3187186/).



7. Scialla JJ, Xie H, Rahman M, Anderson AH, Isakova T, Ojo A, et al. Fibroblast growth factor-23 and cardiovascular events in CKD. *Journal of the American Society of Nephrology: JASN*. 2014; 25(2):349–60. Epub 2013/10/26. doi: [10.1681/asn.2013050465](https://doi.org/10.1681/asn.2013050465) PMID: [24158986](https://pubmed.ncbi.nlm.nih.gov/24158986/); PubMed Central PMCID: PMCPmc3904568.
8. Nakano C, Hamano T, Fujii N, Obi Y, Matsui I, Tomida K, et al. Intact fibroblast growth factor 23 levels predict incident cardiovascular event before but not after the start of dialysis. *Bone*. 2012; 50(6):1266–74. Epub 2012/03/20. doi: [10.1016/j.bone.2012.02.634](https://doi.org/10.1016/j.bone.2012.02.634) PMID: [22425694](https://pubmed.ncbi.nlm.nih.gov/22425694/).
9. Yilmaz MI, Sonmez A, Saglam M, Yaman H, Kilic S, Demirkaya E, et al. FGF-23 and vascular dysfunction in patients with stage 3 and 4 chronic kidney disease. *Kidney international*. 2010; 78(7):679–85. Epub 2010/07/09. doi: [10.1038/ki.2010.194](https://doi.org/10.1038/ki.2010.194) PMID: [20613714](https://pubmed.ncbi.nlm.nih.gov/20613714/).
10. Silswal N, Touchberry CD, Daniel DR, McCarthy DL, Zhang S, Andresen J, et al. FGF23 directly impairs endothelium-dependent vasorelaxation by increasing superoxide levels and reducing nitric oxide bioavailability. *American journal of physiology Endocrinology and metabolism*. 2014; 307(5):E426–36. Epub 2014/07/24. doi: [10.1152/ajpendo.00264.2014](https://doi.org/10.1152/ajpendo.00264.2014) PMID: [25053401](https://pubmed.ncbi.nlm.nih.gov/25053401/); PubMed Central PMCID: PMCPmc4154070.
11. Isakova T. Fibroblast growth factor 23 and adverse clinical outcomes in chronic kidney disease. *Current opinion in nephrology and hypertension*. 2012; 21(3):334–40. Epub 2012/04/11. doi: [10.1097/MNH.0b013e328351a391](https://doi.org/10.1097/MNH.0b013e328351a391) PMID: [22487610](https://pubmed.ncbi.nlm.nih.gov/22487610/); PubMed Central PMCID: PMCPmc3353875.
12. Tanaka H, Hamano T, Fujii N, Tomida K, Matsui I, Mikami S, et al. The impact of diabetes mellitus on vitamin D metabolism in predialysis patients. *Bone*. 2009; 45(5):949–55. Epub 2009/07/28. doi: [10.1016/j.bone.2009.07.016](https://doi.org/10.1016/j.bone.2009.07.016) PMID: [19631779](https://pubmed.ncbi.nlm.nih.gov/19631779/).
13. Craver L, Dusso A, Martinez-Alonso M, Sarro F, Valdivielso JM, Fernandez E. A low fractional excretion of Phosphate/Fgf23 ratio is associated with severe abdominal Aortic calcification in stage 3 and 4 kidney disease patients. *BMC nephrology*. 2013; 14:221. Epub 2013/10/15. doi: [10.1186/1471-2369-14-221](https://doi.org/10.1186/1471-2369-14-221) PMID: [24119158](https://pubmed.ncbi.nlm.nih.gov/24119158/); PubMed Central PMCID: PMCPmc3852798.
14. Kuro OM. A phosphate-centric paradigm for pathophysiology and therapy of chronic kidney disease. *Kidney international supplements*. 2013; 3(5):420–6. Epub 2014/07/16. doi: [10.1038/kisup.2013.88](https://doi.org/10.1038/kisup.2013.88) PMID: [25019024](https://pubmed.ncbi.nlm.nih.gov/25019024/); PubMed Central PMCID: PMCPmc4089674.
15. Matsuo S, Imai E, Horio M, Yasuda Y, Tomita K, Nitta K, et al. Revised equations for estimated GFR from serum creatinine in Japan. *American journal of kidney diseases: the official journal of the National Kidney Foundation*. 2009; 53(6):982–92. Epub 2009/04/03. doi: [10.1053/j.ajkd.2008.12.034](https://doi.org/10.1053/j.ajkd.2008.12.034) PMID: [19339088](https://pubmed.ncbi.nlm.nih.gov/19339088/).
16. Kanda Y. Investigation of the freely available easy-to-use software 'EZR' for medical statistics. *Bone marrow transplantation*. 2013; 48(3):452–8. Epub 2012/12/05. doi: [10.1038/bmt.2012.244](https://doi.org/10.1038/bmt.2012.244) PMID: [23208313](https://pubmed.ncbi.nlm.nih.gov/23208313/); PubMed Central PMCID: PMCPmc3590441.
17. Kestenbaum B, Sampson JN, Rudser KD, Patterson DJ, Seliger SL, Young B, et al. Serum phosphate levels and mortality risk among people with chronic kidney disease. *Journal of the American Society of Nephrology: JASN*. 2005; 16(2):520–8. Epub 2004/12/24. doi: [10.1681/asn.2004070602](https://doi.org/10.1681/asn.2004070602) PMID: [15615819](https://pubmed.ncbi.nlm.nih.gov/15615819/).
18. Block GA, Klassen PS, Lazarus JM, Ofsthun N, Lowrie EG, Chertow GM. Mineral metabolism, mortality, and morbidity in maintenance hemodialysis. *Journal of the American Society of Nephrology: JASN*. 2004; 15(8):2208–18. Epub 2004/07/31. doi: [10.1097/01.asn.0000133041.27682.a2](https://doi.org/10.1097/01.asn.0000133041.27682.a2) PMID: [15284307](https://pubmed.ncbi.nlm.nih.gov/15284307/).
19. Jono S, McKee MD, Murry CE, Shioi A, Nishizawa Y, Mori K, et al. Phosphate regulation of vascular smooth muscle cell calcification. *Circulation research*. 2000; 87(7):E10–7. Epub 2000/09/29. PMID: [11009570](https://pubmed.ncbi.nlm.nih.gov/11009570/).
20. Dominguez JR, Shlipak MG, Whooley MA, Ix JH. Fractional excretion of phosphorus modifies the association between fibroblast growth factor-23 and outcomes. *Journal of the American Society of Nephrology: JASN*. 2013; 24(4):647–54. Epub 2013/03/23. doi: [10.1681/asn.2012090894](https://doi.org/10.1681/asn.2012090894) PMID: [23520205](https://pubmed.ncbi.nlm.nih.gov/23520205/); PubMed Central PMCID: PMCPmc3609138.
21. Bech AP, Bouma-de Krijger A, van Zuilen AD, Bots ML, van den Brand JA, Blankestijn PJ, et al. Impact of fractional phosphate excretion on the relation of FGF23 with outcome in CKD patients. *Journal of nephrology*. 2015; 28(4):477–84. Epub 2015/02/24. doi: [10.1007/s40620-015-0178-0](https://doi.org/10.1007/s40620-015-0178-0) PMID: [25700931](https://pubmed.ncbi.nlm.nih.gov/25700931/); PubMed Central PMCID: PMCPmc4498282.
22. Scialla JJ, Lau WL, Reilly MP, Isakova T, Yang HY, Crouthamel MH, et al. Fibroblast growth factor 23 is not associated with and does not induce arterial calcification. *Kidney international*. 2013; 83(6):1159–68. Epub 2013/02/08. doi: [10.1038/ki.2013.3](https://doi.org/10.1038/ki.2013.3) PMID: [23389416](https://pubmed.ncbi.nlm.nih.gov/23389416/); PubMed Central PMCID: PMCPmc3672330.
23. Reyes-Garcia R, Garcia-Martin A, Garcia-Fontana B, Morales-Santana S, Rozas-Moreno P, Munoz-Torres M. FGF23 in type 2 diabetic patients: relationship with bone metabolism and vascular disease. *Diabetes care*. 2014; 37(5):e89–90. Epub 2014/04/24. doi: [10.2337/dc13-2235](https://doi.org/10.2337/dc13-2235) PMID: [24757249](https://pubmed.ncbi.nlm.nih.gov/24757249/).

24. Garimella PS, Ix JH, Katz R, Chonchol MB, Kestenbaum BR, de Boer IH, et al. Fibroblast growth factor 23, the ankle-brachial index, and incident peripheral artery disease in the Cardiovascular Health Study. *Atherosclerosis*. 2014; 233(1):91–6. Epub 2014/02/18. doi: [10.1016/j.atherosclerosis.2013.12.015](https://doi.org/10.1016/j.atherosclerosis.2013.12.015) PMID: [24529128](https://pubmed.ncbi.nlm.nih.gov/24529128/); PubMed Central PMCID: PMCPmc3927151.
25. Macisaac RJ, Ekinci EI, Jerums G. Markers of and risk factors for the development and progression of diabetic kidney disease. *American journal of kidney diseases: the official journal of the National Kidney Foundation*. 2014; 63(2 Suppl 2):S39–62. Epub 2014/01/28. doi: [10.1053/j.ajkd.2013.10.048](https://doi.org/10.1053/j.ajkd.2013.10.048) PMID: [24461729](https://pubmed.ncbi.nlm.nih.gov/24461729/).
26. Janghorbani M, Van Dam RM, Willett WC, Hu FB. Systematic review of type 1 and type 2 diabetes mellitus and risk of fracture. *American journal of epidemiology*. 2007; 166(5):495–505. Epub 2007/06/19. doi: [10.1093/aje/kwm106](https://doi.org/10.1093/aje/kwm106) PMID: [17575306](https://pubmed.ncbi.nlm.nih.gov/17575306/).
27. Yamamoto M, Yamaguchi T, Yamauchi M, Kaji H, Sugimoto T. Diabetic patients have an increased risk of vertebral fractures independent of BMD or diabetic complications. *Journal of bone and mineral research: the official journal of the American Society for Bone and Mineral Research*. 2009; 24(4):702–9. Epub 2008/12/04. doi: [10.1359/jbmr.081207](https://doi.org/10.1359/jbmr.081207) PMID: [19049338](https://pubmed.ncbi.nlm.nih.gov/19049338/).
28. Yamamoto M, Yamaguchi T, Nawata K, Yamauchi M, Sugimoto T. Decreased PTH levels accompanied by low bone formation are associated with vertebral fractures in postmenopausal women with type 2 diabetes. *The Journal of clinical endocrinology and metabolism*. 2012; 97(4):1277–84. Epub 2012/02/18. doi: [10.1210/jc.2011-2537](https://doi.org/10.1210/jc.2011-2537) PMID: [22337915](https://pubmed.ncbi.nlm.nih.gov/22337915/).
